# Supplementary material for: Quantitative Proteomics After Spinal Cord Injury (SCI) in a Regenerative and a Nonregenerative Stage in the Frog Xenopus laevis
Source: PubMed Central journal article supplement (PMC5880103; doi:10.1074/mcp.ra117.000215), 2018-01-22
Supplement: supp_RA117.000215_4818_1_supp_46816_p1scml.pdf [file supp_RA117.000215_4818_1_supp_46816_p1scml.pdf]

## **Supplementary data legends**

**Supplementary data 1.** Lists of quantified proteins, all differentially expressed proteins, and top 15 proteins with the highest fold-changes.

**Supplementary data 2.** Full gene ontology enrichment analysis results for regenerative and non-regenerative stages including protein names.

**Supplementary data 3.** Complete data of reporter ion intensities for all identified proteins and all quantified proteins before normalization, and after normalization for all quantified proteins.

**Supplementary data 4.** Full list of protein groups and peptide ID list.

**Supplementary data 5.** Reproducibility data for biological replicates (see file for individual figure legends).

**Supplementary data 6.** Full list of gene ontology (GO) categories that were enriched in both RNA-Seq and iTRAQ data. Only level 5 GO terms are shown, and a separate sheet for each category is included to show the terms that were exclusively found in either the regenerative or the non-regenerative stage. Of note, no such terms were found for the cellular component category of the non-regenerative stage.
