# Supplementary material for: Quantitative Proteomics After Spinal Cord Injury (SCI) in a Regenerative and a Nonregenerative Stage in the Frog Xenopus laevis
Source: PubMed Central journal article supplement (PMC5880103; doi:10.1074/mcp.ra117.000215), 2018-01-22
Supplement: supp_RA117.000215_4818_1_supp_46821_p1scmm.pdf [file supp_RA117.000215_4818_1_supp_46821_p1scmm.pdf]

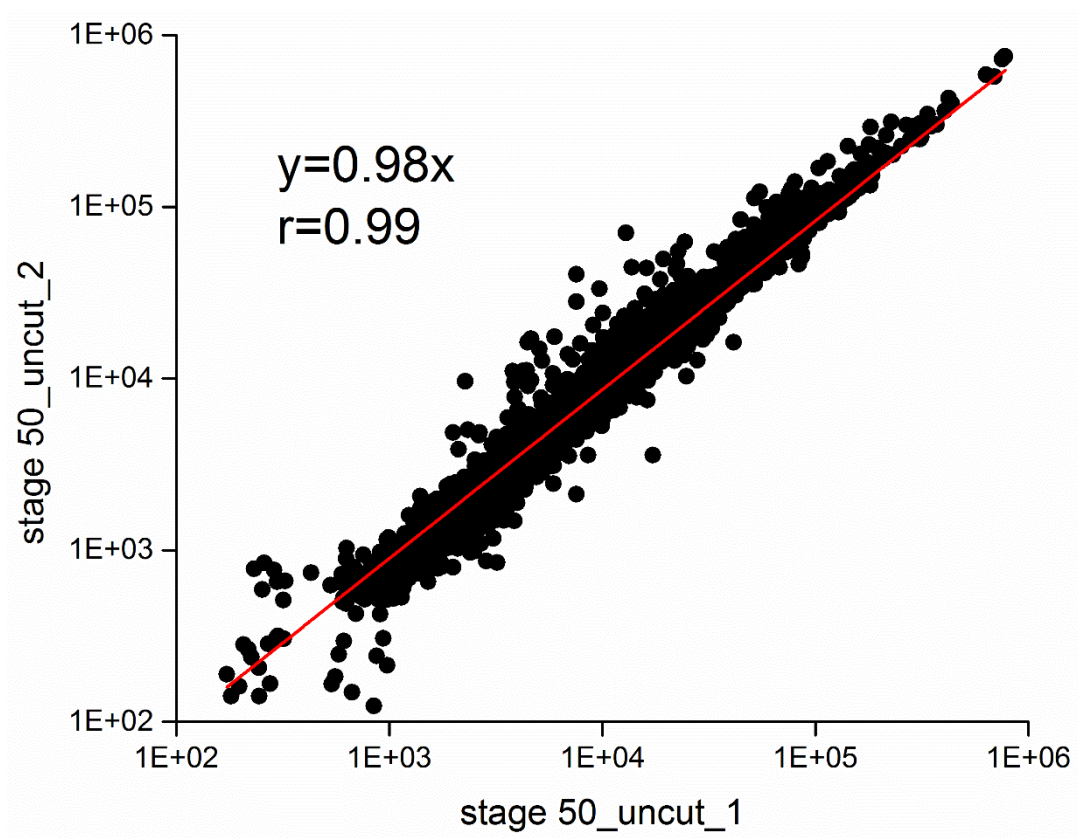

**Figure S1:** Correlation of reporter ion intensity between biological replicates of uncut samples at stage 50.

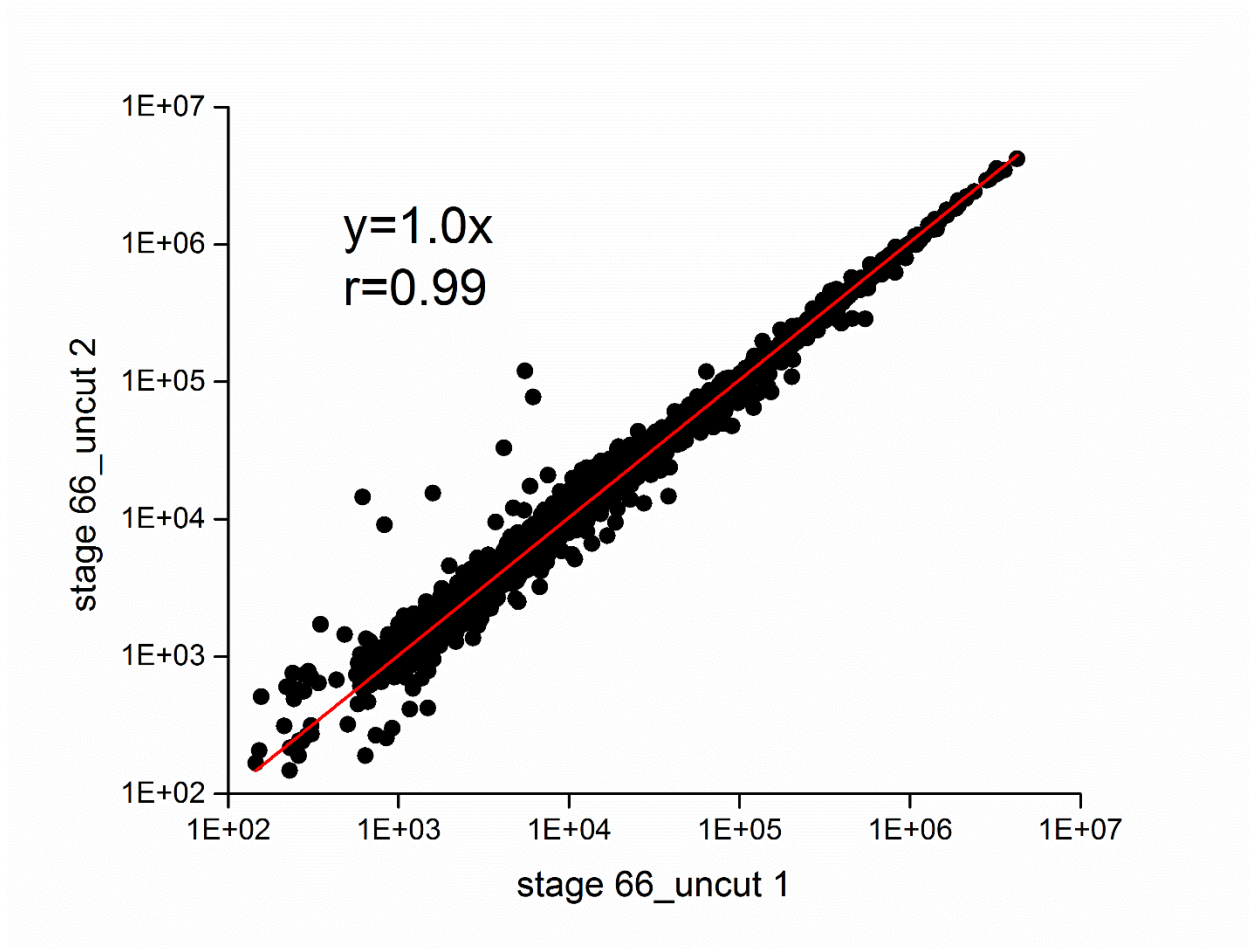

**Figure S2:** Correlation of reporter ion intensity between biological replicate of uncut samples at stage 66.

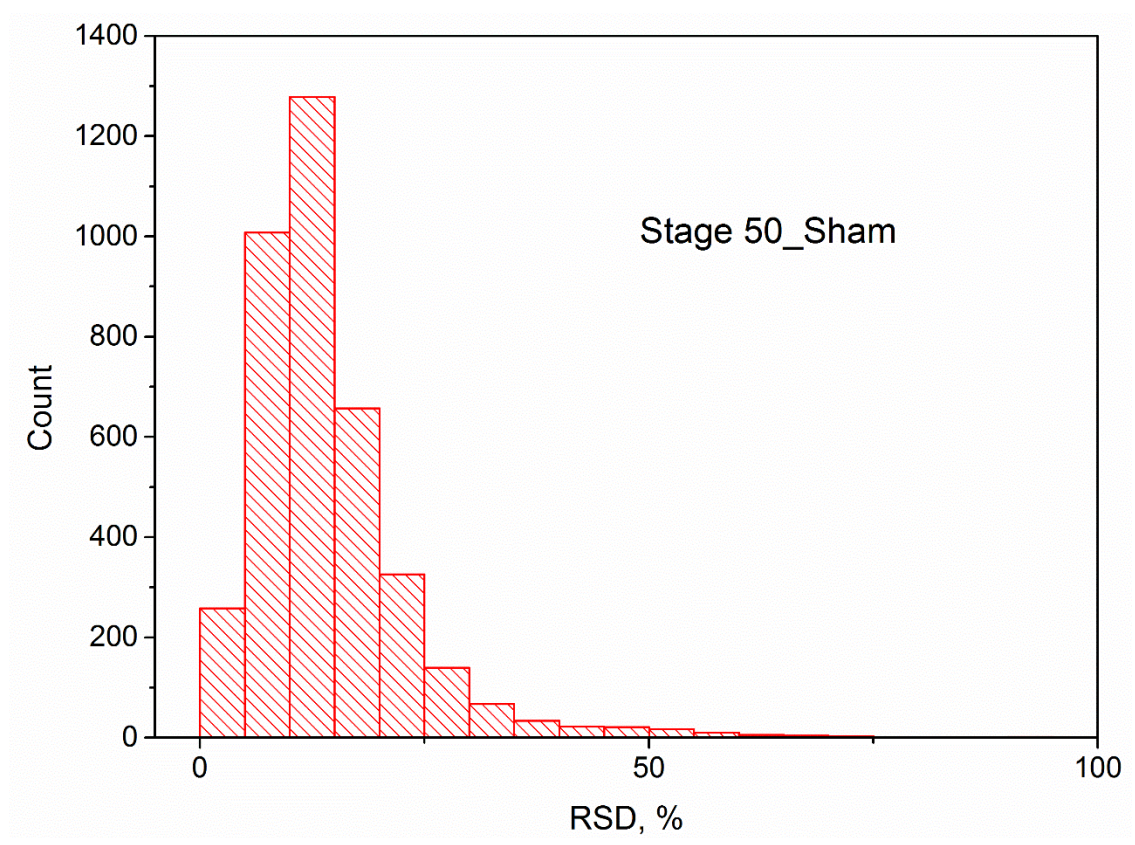

**Figure S3.** Distribution of the relative standard deviation (RSD) of reporter ion intensity from biological triplicate of sham samples at stage 50.

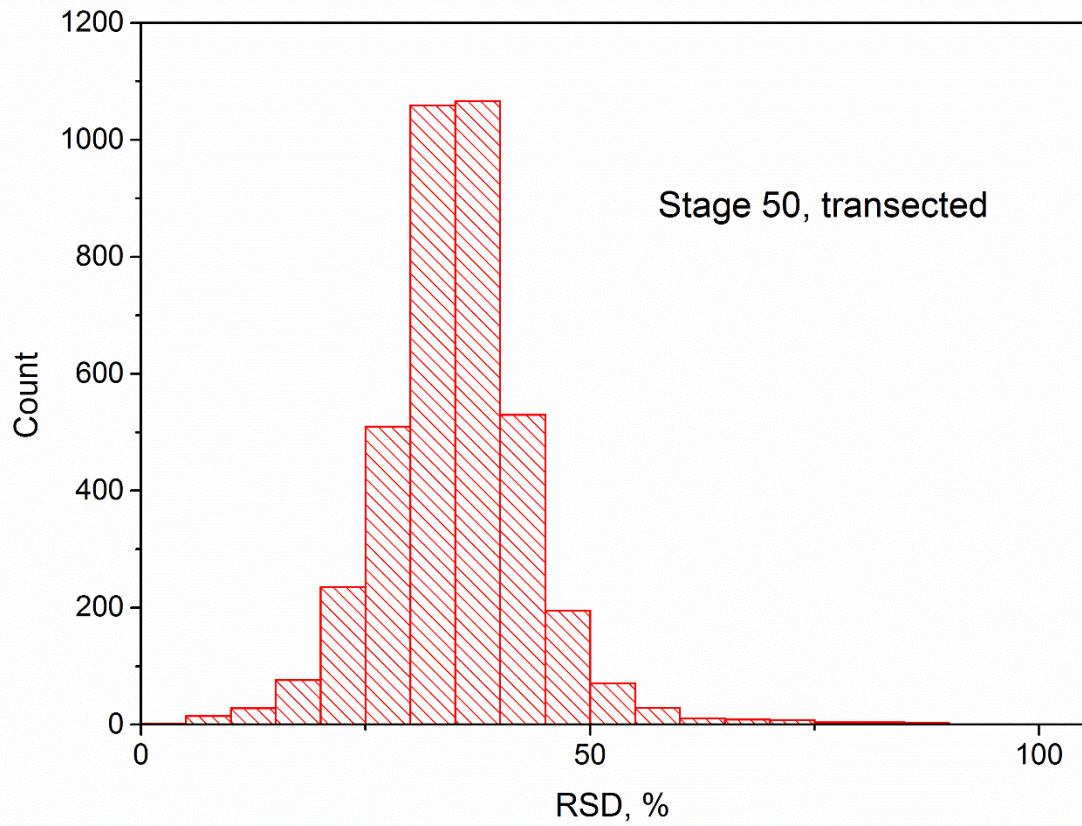

**Figure S4.** Distribution of the relative standard deviation (RSD) of reporter ion intensity from biological triplicate of transected samples at stage 50.



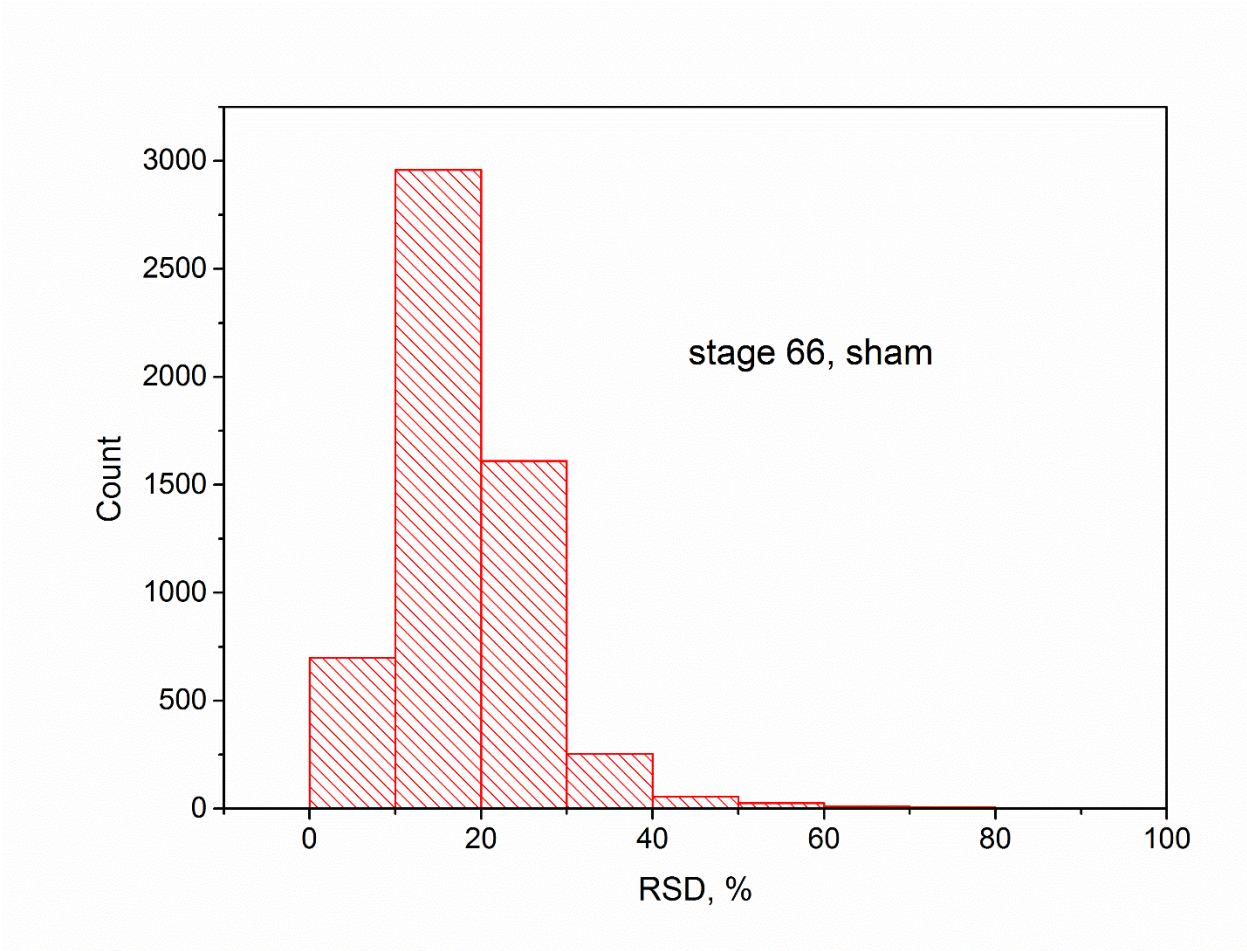

**Figure S5.** Distribution of the relative standard deviation (RSD) of reporter ion intensity from biological triplicate of sham samples at stage 66.

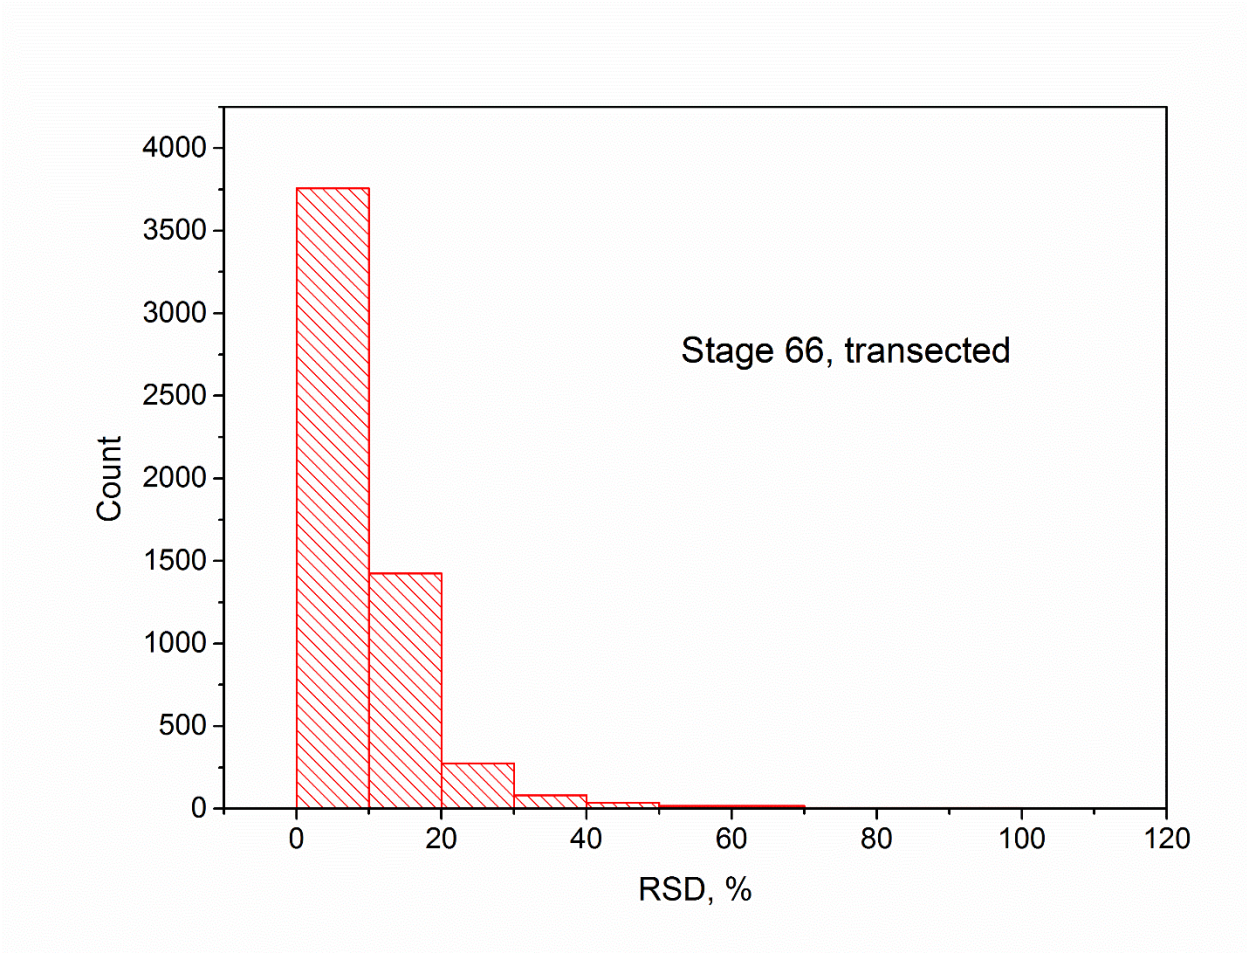

**Figure S6.** Distribution of the relative standard deviation (RSD) of reporter ion intensity from biological triplicate of transected samples at stage 66.
